# Supplementary material for: Understanding UCEs: A Comprehensive Primer on Using Ultraconserved Elements for Arthropod Phylogenomics
Source: Preprints.org preprint supplement (doi:10.20944/preprints201905.0384.v2), 2019-08-04
Supplement: Supplementary file 1 [file supplementary]

## Sheet: Arthropod UCE Methods
Reference	Year	Taxonomic Level	Group	Taxon	Extraction	Sequencer	Trimming	Assembler	Alignment	Partitioning	Dataset(s)	ML	BI	MSC	Dating	Biogeography	Diversification	Others	Avg Reads	Avg Contigs	Avg Loci #	Avg Loci Length
Baca et al. 2017b	2017	Suborder	Coleoptera	Adephaga	non-destructive, Qiagen	HiSeq 5000 PE		Trinity	MAFFT	Unpartitioned/By Locus	50, 60, 70, 80, 90, 100	RAxML		ASTRAL/ASTRID/SVDquartets					3158813	19693	346	376
Blaimer et al. 2015	2015	Subfamily	Hymenoptera	Formicinae	destructive/non, Qiagen	HiSeq 2500 PE	Illumiprocessor	Trinity	MAFFT	Partitioned (unspecified)	70, 100best, 95	RAxML/GARLI	MrBayes		BEAST	RASP			1606086	29654.5	936	805.3
Blaimer et al. 2016a	2016	Genus	Hymenoptera	Acropyga	destructive/non, Qiagen	HiSeq 2500 PE	Illumiprocessor	Trinity	MAFFT	Partitioned (unspecified)	70	RAxML		ASTRAL	BEAST	RASP			1418055	18226	945	883.7
Blaimer et al. 2016b	2016	Genus	Hymenoptera	Xylocopa	destructive (pinned, leg), Qiagen	MiSeq	Illumiprocessor	Trinity	MAFFT	Partitioned (unspecified)	50, 70	RAxML						Correlation between specimen age and DNA yield	1278680	248227	972	1041.6
Blaimer et al. 2018a	2018	Genus	Hymenoptera	Xylocopa	destructive (pinned, leg), Qiagen	HiSeq 2500 PE	Illumiprocessor	Trinity	MAFFT	By Locus, K-means	70	RAxML	ExaBayes	ASTRAL	BEAST2		BAMM		1176982	17559	858	365
Blaimer et al. 2018b	2018	Tribe	Hymenoptera	Crematogastrini	destructive/non, Qiagen	HiSeq 2500 PE	Illumiprocessor	Trinity	MAFFT	Unpartitioned/By Locus/rcluster	90	RAxML		ASTRAL	BEAST2	BioGeoBEARS	BAMM/BAMMtools		2279011	59518	2200	654
Borowiec 2019	2019	Subfamily	Hymenoptera	Dorylinae	destructive/non, Qiagen	HiSeq 2500 PE	Illumiprocessor		UPP	Unpartitioned/By Locus/K-means		RAxML	ExaBayes	ASTRAL	ape/BEAST2	BioGeoBEARS	BAMM	Extraction of protein coding genes, RCFV for compositional heterogeneity
Bossert et al. 2019	2019	Family	Hymenoptera	Apidae	destructive(legs/thoracic muscle), phenol chloroform	HiSeq 2500/3000 PE	Illumiprocessor	Trinity	MAFFT	By Locus		IQ-TREE	PhyloBayes	ASTRAL					1750000/2030000		900
Branstetter and Longino 2019	2019	Species	Hymenoptera	Ponera	Qiagen	HiSeq 2500 PE	Illumiprocessor	Trinity	MAFFT	SWSC	90	IQ-TREE		ASTRAL	BEAST2				4397720	39229	2187	801.5
Branstetter et al. 2017a	2017	Family	Hymenoptera	Formicidae	Qiagen		Illumiprocessor	Trinity	MAFFT	Unpartitioned/By Locus/hcluster	25, 50, 75, 90, 95, 98, 100	RAxML		ASTRAL					4.71244e+06	55758.4	2214	921.6
Branstetter et al. 2017b	2017	Tribe	Hymenoptera	Attini	Qiagen		Illumiprocessor	Trinity	MAFFT	unpartitioned, by locus/rcluster, kmeans	75	RAxML	ExaBayes	ASTRAL	BEAST	BioGeoBEARS	BAMM	Ancestral State Reconstruction (BEAST/APE)	2961464	10467	962	922.8
Branstetter et al. 2017c	2017	Infraorder	Hymenoptera	Aculeata	Qiagen	HiSeq 2500 Rapid Run	Illumiprocessor	Trinity	MAFFT	unpartitioned/by locus/hcluster/rcluster/kmeans	25, 50, 75, 90, 95	RAxML	ExaBayes	ASTRAL	BEAST				2788562	38218	972	739.1
Cooke 2018	2018	Tribe	Hymenoptera	Cynipini	destructive, Qiagen	HiSeq 2500 PE	Illumiprocessor	Trinity	MAFFT	rcluster	70	RAxML									956	450
Cruaud et al. 2019	2019	Superfamily	Hymenoptera	Chalcidoidea	non-destructive, Qiagen	MiSeq PE 300bp	Trimmomatic	cap3	Geneious/LASTZ	Unpartitioned	25	RAxML/IQ-TREE		ASTRAL/ASTRID					76330	3454	687	603
Derkarabetian et al. 2018	2018	Suborder	Arachnida	Laniatores	destructive/non, Qiagen	NextSeq PE 150bp	Illumiprocessor	velvet/Trinity	MAFFT	?	50, 70	RAxML	BEAST2	ASTRAL/SVDquartets					5829946	993008	747	253
Derkarabetian et al. 2019	2018	Genus	Arachnida	Metanonychus	non-destructive, Qiagen		Illumiprocessor	Trinity	MAFFT	Unpartitioned	70	RAxML						Species delimitation			158	411
Faircloth et al. 2015	2015	Order	Hymenoptera	Hymenoptera	Qiagen, phenol chloroform	MiSeq PE 250bp	Illumiprocessor	Trinity	MAFFT	Unpartitioned	75	RAxML							1100000
Forthman et al. 2019	2019	Superfamily	Hemiptera	Coreoidea	destructive/non, Qiagen	HiSeq 3000 PE		Trinity	MAFFT	rcluster	50, 60, 70	RAxML		ASTRAL					5851837	11333	763	701
Grab et al. 2019	2019	Superfamily	Hymenoptera	Apoidea/Anthophila	non-destructive, Qiagen/phenol chloroform	HiSeq 2500 PE		Trinity	MAFFT	By Locus/rcluster	90		ExaBayes		ExaBayes		BAMM	Community phylogenomics
Hedin et al. 2018a	2018	Infraorder	Arachnida	Mygalomorphae	destructive (leg), Qiagen/phenol chloroform	HiSeq 2500 PE	Illumiprocessor	velvet/Trinity	MAFFT	Unpartitioned/?	50, 70	RAxML		ASTRAL/SVDquartets					3014737	765928	395
Hedin et al. 2018b	2018	Genus	Arachnida	Cicurina	destructive (leg), Qiagen/phenol chloroform	HiSeq 2500 PE	Illumiprocessor	velvet	MAFFT	By Locus	50, 70	RAxML	BEAST2	ASTRAL/SVDquartets					2063908	552527	399
Hedin et al. 2019	2019	Superfamily	Arachnida	Atypoidea	destructive (leg), Qiagen/phenol chloroform	HiSeq 2500 PE	Illumiprocessor	velvet/Trinity	MAFFT	Unpartitioned/?	70, 70 exon + intron	RAxML/IQ-TREE		SVDquartets	Phylobayes			UCE annotation	2277240	528115	596
Ješovnik et al. 2017	2017	Genus	Hymenoptera	Sericomyrmex	destructive/non, Qiagen	HiSeq 2500 Rapid Run	Illumiprocessor	Trinity	MAFFT	kmeans/by locus/hcluster	70	RAxML		ASTRAL	BEAST2				1.43804e+06	19792.4	1001.67	854.7
Kieran et al. 2019	2019	Order	Hemiptera	Hemiptera	Qiagen/Puregene	HiSeq 3000 PE	Illumiprocessor	Trinity	MAFFT	By Locus	50, 60	RAxML							1955076	3641	904
Pierce et al. 2017	2017	Genus	Hymenoptera	Hylomyrma	destructive/non, Qiagen	HiSeq 2500			MAFFT	unpartitioned, by locus, hcluster		RAxML							4588826	53998	2283	943.9
Prebus 2017	2017	Genus	Hymenoptera	Temnothorax	destructive/non, Qiagen	HiSeq 2500 PE	Illumiprocessor	Trinity	MAFFT	Partitioned	25, 50, 75, 90, 95, 99, 100	RAxML	MrBayes	ASTRAL	BEAST2	BioGeoBEARS	HiSSE	Ancestral State Reconstruction with HiSSE	6439340	87199	2314	1002.6
Santos et al. 2019	2019	Subfamily	Hymenoptera	Cryptinae	destructive/non, Qiagen	HiSeq 2500 PE	Illumiprocessor	Trinity	MAFFT	By Locus	50	RAxML						UCE extraction from transcriptome	405082	1474
Starrett et al. 2017	2017	Class	Arachnida	Arachnida	destructive, Qiagen	NextSeq PE 150bp	Illumiprocessor	Trinity	MAFFT	Unpartitioned	50, 70, 90	RAxML		ASTRAL					1240463	35884	487
Stroher et al. 2019	2019	Species	Hymenoptera	5 Formicidae spp.	PureLink	HiSeq 2000 PE 100bp	Trimmomatic	Trinity	MAFFT	Unpartitioned	75	RAxML			BEAST			Phylogeography of five species from Brazilian Atlantic Forest
Van Dam et al. 2017	2017	Tribe	Coleoptera	Eupholini	non-destructive (leg, thorax), Qiagen	HiSEq 3000 PE 100bp	Illumiprocessor	Trinity	MAFFT	By Locus/greedy	70	RAxML		ASTRAL/SVDquartets					12000000		470
Ward and Branstetter 2017	2017	Genus	Hymenoptera	Pseudomyrmex	Qiagen	HiSeq 2500 PE 125bp	Illumiprocessor	Trinity	MAFFT	unpartitioned, hcluster, kmeans	95	RAxML	ExaBayes	ASTRAL	BEAST	BioGeoBEARS			4840361	52204	2160	776.5
Wood et al. 2018	2018	Infraorder	Arachnida	Palpimanoidea	non-destructive, Qiagen	HiSeq 2500 PE	Illumiprocessor	Trinity	MAFFT	SWSC	25, 50, 70	RAxML	MrBayes						2047135	30918	341
